# Supplementary material
Source: PubMed Central journal article supplement (PMC9765029)
Supplement: jb.00290-22-s0001.pdf [file jb.00290-22-s0001.pdf]

## SUPPORTING INFORMATION

### Roles and Organization of BxpB (ExsFA) and ExsFB in the Exosporium Outer Basal Layer of *Bacillus anthracis*

Jorge Durand-Heredia, Hsin-Yeh Hsieh, Krista A. Spreng, and George C. Stewart\*

Department of Veterinary Pathobiology and Bond Life Sciences Center  
University of Missouri  
Columbia, Missouri, 65211

\*To whom correspondence should be addressed. Email: [stewartgc@missouri.edu](mailto:stewartgc@missouri.edu)

#### Contents

|                                                   | Page(s) |
|---------------------------------------------------|---------|
| Table S1: Table of Bacterial Strains and Plasmids | 2 - 4   |
| Figure S1                                         | 5       |
| Figure S2                                         | 6       |
| References                                        | 7       |

**Table S1. Bacterial strains and plasmids**

| <b>Strain</b>                    | <b>Relevant characteristic(s)</b>                                                                                                                  | <b>Source or reference</b> |
|----------------------------------|----------------------------------------------------------------------------------------------------------------------------------------------------|----------------------------|
| <b><i>Bacillus anthracis</i></b> |                                                                                                                                                    |                            |
| ΔSterne                          | plasmid-free derivative of Sterne                                                                                                                  | Lab stock                  |
| MUS7999                          | Sterne Δ <i>exsFB</i> :: <i>spc</i>                                                                                                                | This study                 |
| MUS8134                          | Sterne Δ <i>exsFB</i>                                                                                                                              | This study                 |
| MUS8135                          | Sterne <i>bxpB</i> :: <i>kan</i> Δ <i>exsFB</i>                                                                                                    | This study                 |
| MUS8227                          | Sterne <i>bxpB</i> :: <i>kan</i> Δ <i>cotE</i> Δ <i>exsFB</i>                                                                                      | This study                 |
| MUS8228                          | Sterne Δ <i>exsY</i>                                                                                                                               | This study                 |
| MUS8229                          | Sterne Δ <i>cotY</i>                                                                                                                               | This study                 |
| MUS8230                          | Sterne Δ <i>cotY</i> Δ <i>exsY</i>                                                                                                                 | This study                 |
| MUS8232                          | Sterne Δ <i>cotE</i> :: <i>kan</i> Δ <i>cotY</i> Δ <i>exsY</i>                                                                                     | This study                 |
| RG56                             | Sterne Δ <i>cotE</i> :: <i>kan</i>                                                                                                                 | (1)                        |
| RG124                            | Sterne Δ <i>bxpB</i> :: <i>kan</i>                                                                                                                 | (2)                        |
| Sterne                           | pXO1 <sup>+</sup> pXO2 <sup>-</sup>                                                                                                                | Lab stock                  |
| <b><i>E. coli</i></b>            |                                                                                                                                                    |                            |
| BTH101                           | <i>cya-99, rpsL1 (Str r), hsdR2, mcrA1, mcrB1</i>                                                                                                  | (3)                        |
| DH5α                             | <i>φ80dlacZΔM15 recA1 endA1 gyrA96 thi-1 hsdR17 (r<sub>K</sub><sup>-</sup> m<sub>K</sub><sup>-</sup>)<br/>supE44 relA1 deoR Δ(lacZYA-argF)U169</i> | Lab stock                  |
| GM48                             | <i>F<sup>-</sup> thr leu thi lacY galK galT ara fhuA tsx dam dcm glnV44</i>                                                                        | Lab stock                  |
| M15                              | <i>str lacZΔM15</i>                                                                                                                                | Qiagen                     |
| MUS4186                          | M15 pREP4 pKS4186                                                                                                                                  | This study                 |
| MUS4691                          | M15 pREP4 pJD4886                                                                                                                                  | This study                 |

## Plasmids

| Plasmid | Description                                                                                                    | Source or reference |
|---------|----------------------------------------------------------------------------------------------------------------|---------------------|
| pDG4099 | pMK4 <i>egfp</i> fusion vector                                                                                 | (4)                 |
| pDG4100 | pMK4 <i>mcherry</i> fusion vector                                                                              | (5)                 |
| pGS4260 | pMK4 <i>bclA</i> promoter - <i>bclA</i> NTD- <i>mcherry</i>                                                    | (5)                 |
| pGS4294 | Allele replacement ts shuttle vector Amp <sup>r</sup> , Ery <sup>r</sup>                                       | Lab stock           |
| pGS4709 | pMK4- <i>bclA</i> promoter - <i>rbs</i> - <i>mcherry</i>                                                       | Lab stock           |
| pGS4900 | pMK4 - P <sub><i>bclA</i></sub> - <i>bclA</i> NTD- <i>his12</i>                                                | This study          |
| pGS4618 | pGS4294 - $\Delta$ <i>exsFB</i> :: <i>spc</i>                                                                  | This study          |
| pGS6328 | pGS4295 - <i>amyS</i> :: <i>spc</i> ; Amp <sup>R</sup> , Ery <sup>R</sup> , Spc <sup>R</sup> ts shuttle vector | (6)                 |
| pHPS2   | Shuttle vector; Spc <sup>r</sup> , Ery <sup>r</sup>                                                            | (7)                 |
| pJD4693 | pMK4 - P <sub><i>bxpB</i></sub> - <i>exsFB</i>                                                                 | This study          |
| pJD4695 | pMK4 - P <sub><i>exsFB</i></sub> - <i>bxpB</i>                                                                 | This study          |
| pJD4696 | pMK4 - P <sub><i>bxpB</i></sub> - <i>bxpB</i> (NT) - <i>exsFB</i> (CT)                                         | This study          |
| pJD4697 | pMK4 - P <sub><i>exsFB</i></sub> - <i>exsFB</i> (NT) - <i>bxpB</i> (CT)                                        | This study          |
| pJD4698 | pMK4 - P <sub><i>bxpB</i></sub> - <i>exsFB</i> (NT) - <i>bxpB</i> (CT)                                         | This study          |
| pJD4699 | pMK4 - P <sub><i>exsFB</i></sub> - <i>bxpB</i> (NT) - <i>exsFB</i> (CT)                                        | This study          |
| pJD4730 | pMK4 - P <sub><i>bxpB</i></sub> - <i>bxpB</i>                                                                  | This study          |
| pJD4732 | pMK4 - P <sub><i>exsFB</i></sub> - <i>exsFB</i>                                                                | This study          |
| pJD4813 | pDG4099 - P <sub><i>bxpB</i></sub> - <i>bxpB</i> - <i>egfp</i>                                                 | This study          |
| pJD4814 | pDG4099 - P <sub><i>exsFB</i></sub> - <i>exsFB</i> - <i>egfp</i>                                               | This study          |
| pJD4886 | pQE30 - <i>exsFB</i>                                                                                           | This study          |
| pJD6139 | pHPS2 - P <sub><i>bxpB</i></sub> - <i>bxpB</i> - <i>mcherry</i>                                                | This study          |
| pJD6163 | pHPS2 - P <sub><i>exsFB</i></sub> - <i>exsFB</i> - <i>mcherry</i>                                              | This study          |
| pJD6268 | pKT25 - <i>T25</i> - <i>bxpB</i>                                                                               | This study          |
| pJD6269 | pKT25 - <i>T25</i> - <i>exsFB</i>                                                                              | This study          |

|            |                                                                                                       |            |
|------------|-------------------------------------------------------------------------------------------------------|------------|
| pJD6443    | pUT18 - <i>bxpB</i> - <i>T18</i>                                                                      | This study |
| pJD6444    | pKNT25 - <i>exsFB</i> - <i>T25</i>                                                                    | This study |
| pJD6445    | pUT18 - <i>exsFB</i> - <i>T18</i>                                                                     | This study |
| pJD6446    | pUT18C - <i>T18</i> - <i>bxpB</i>                                                                     | This study |
| pJD6447    | pUT18C - <i>T18</i> - <i>exsFB</i>                                                                    | This study |
| pJD6448    | pKT25 - <i>T25</i> - <i>aw20_5669</i>                                                                 | This study |
| pJD6450    | pUT18C - <i>T18</i> - <i>exsY</i>                                                                     | This study |
| pJD6471    | pKNT25 - <i>bxpB</i> - <i>T25</i>                                                                     | This study |
| pKNT25     | Kan <sup>r</sup> , in-frame fusions at the C-terminal end of the T25<br>adenylate cyclase polypeptide | (3)        |
| pKS4186    | pQE30- <i>bxpB</i>                                                                                    | (8)        |
| pKT25      | Kan <sup>r</sup> , in-frame fusions at the N-terminal end of the T25<br>adenylate cyclase polypeptide | (3)        |
| pKT25-Zip  | pKT25 with Zip domain                                                                                 | (3)        |
| pMK4       | Shuttle plasmid Amp <sup>r</sup> , Cm <sup>r</sup>                                                    | (9)        |
| pQE30      | His-tag cloning vector; Amp <sup>r</sup>                                                              | Qiagen     |
| pREP4      | p15a origin, LacI expression plasmid; kan <sup>r</sup>                                                | Qiagen     |
| pUT18      | Amp <sup>r</sup> ; in-frame fusions at the N-terminal end of the T18<br>adenylate cyclase polypeptide | (3)        |
| pUT18C     | Amp <sup>r</sup> ; in-frame fusions at the C-terminal end of the T18<br>adenylate cyclase polypeptide | (3)        |
| pUT18C-Zip | pUT18C with Zip domain                                                                                | (3)        |

<sup>a</sup> Amp<sup>r</sup>, Cm<sup>r</sup>, Ery<sup>r</sup>, Kan<sup>r</sup> and Spc<sup>r</sup> denote resistance to 100 µg ampicillin ml<sup>-1</sup>, 10 µg chloramphenicol ml<sup>-1</sup>, 5 µg erythromycin ml<sup>-1</sup>, 50 µg kanamycin ml<sup>-1</sup>, and 100 µg spectinomycin ml<sup>-1</sup>, respectively.

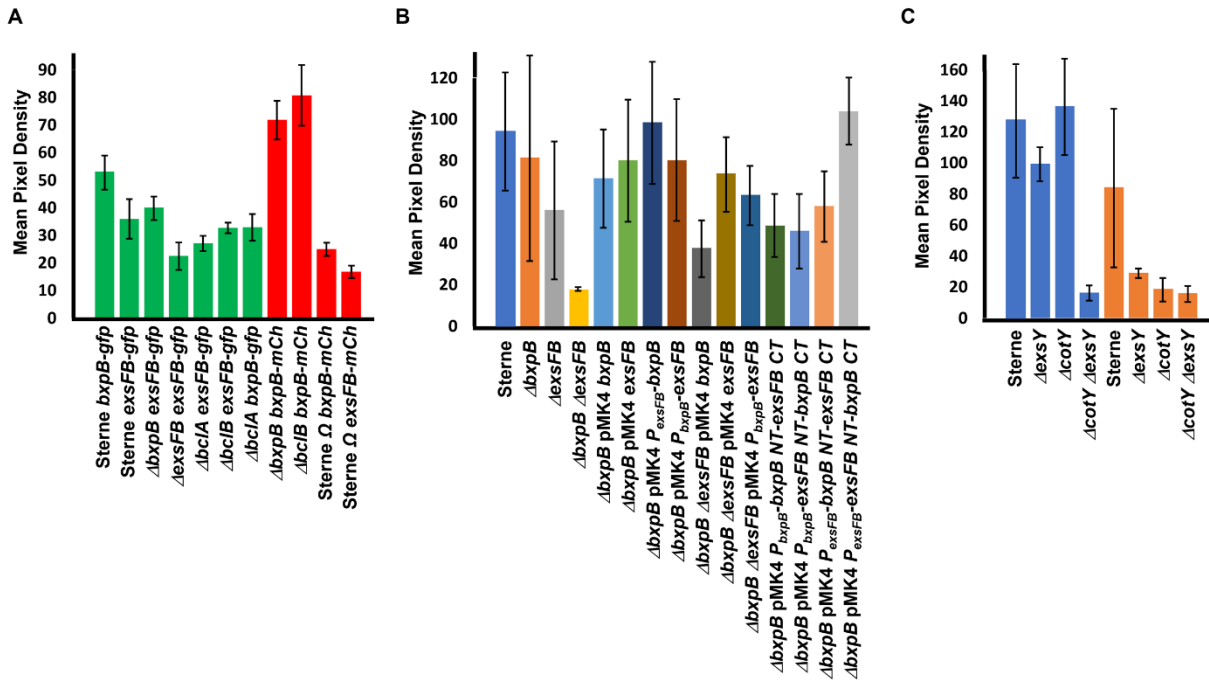

**Figure S1.** Fluorescence intensity of the spore micrographs used in this study were measured as mean pixel density with the NIH ImageJ program. Approximately 25 fluorescent spores from each experimental condition were included in the assessment. The bars represent the mean pixel density of this population and the error bars are the standard deviation. Panel A are the results from the spores containing eGFP fusion proteins (green bars) and mCherry fusion proteins (red bars) corresponding to the Figure 1-based experiments. Panel B shows the results of the anti-BclA fluorescence experiments from Figures 2- and 3-based experiments. Panel C shows the results of the anti-BclA fluorescence (blue bars) and anti-BxpB fluorescence from Figure 6-based experiments.

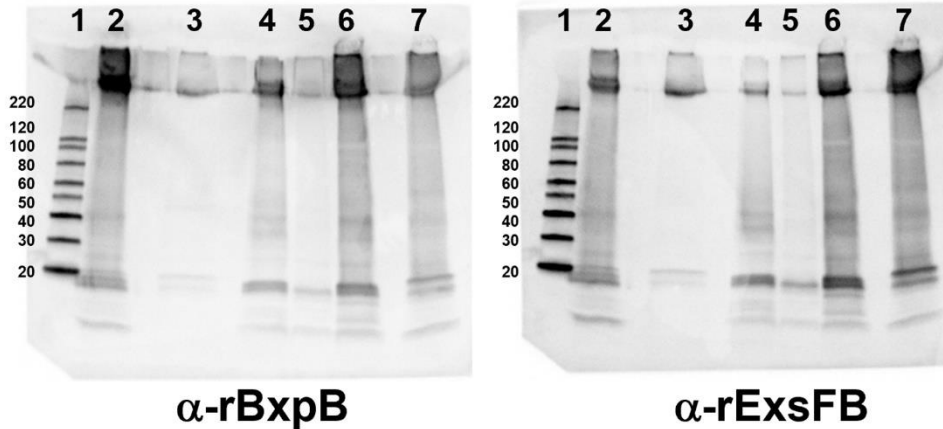

**Figure S2.** Western blots of spore extracts probed with rabbit polyclonal antiserum against rBxpB (left panel), or rExsFB (right panel). Ten mg of spores in a volume of 100  $\mu$ l were extracted by boiling in the presence of SDS and urea and 15  $\mu$ l of the supernatant loaded onto an SDS-PAGE gradient gel and the proteins resolved by electrophoresis. The proteins were electro-transferred to an Immobilon membrane. The membrane was probed with the anti-ExsFB antiserum, then stripped and re-probed with the anti-BxpB antiserum. Lane 1 is the protein size standard with the molecular weights in kilodaltons listed to the left. Lanes 2-7 are the spore extracts: 2, Sterne; 3, Sterne  $\Delta bxB$ ; 4, Sterne  $\Delta exsFB$ ; 5, Sterne  $\Delta bxB \Delta exsFB$ ; 6, Sterne  $\Delta bxB \Delta exsFB$  pMK4 *bxB*; and 7, Sterne  $\Delta bxB \Delta exsFB$  pMK4 *exsFB*.

The molecular masses of BxpB and ExsFB are 17.33 kDa and 17.48 kDa, respectively. However, the two proteins resolved into distinct bands, migrating below the 20 kDa marker, in this electrophoresis system. Unfortunately, rabbit serum recognizes a band of approximately the same size in the *B. anthracis* spore extracts, resulting in triplet bands in the Sterne extract and one remaining species in the  $\Delta bxB \Delta exsFB$  extracts. The BxpB and ExsFB proteins are found in the extracts in both monomer and oligomeric forms that are stable to the denaturation conditions employed. The high molecular weight species are characteristic of exosporium structural proteins. ImageJ was used to quantify the amount of BxpB and ExsFB in the extracts from the parent Sterne strain and Sterne bearing the pMK4-based complementation plasmids. The plasmid-expressed determinants resulted in higher levels of expression of the proteins. BxpB was found to be elevated 3.7-fold relative to the single copy determinant in Sterne and the elevation of ExsFB as 2.7-fold. It was not surprising that the elevated gene dosage from the plasmid-based would result in higher expression level and consequently elevated protein levels in the spores. The BxpB and ExsFB proteins were elevated to similar extents overall in the spores from the strains bearing the complementation plasmids.

## REFERENCES

1. Giorno R, Bozue J, Cote C, Wenzel T, Moody KS, Mallozzi M, Ryan M, Wang R, Zielke R, Maddock JR, Friedlander A, Welkos S, Driks A. 2007. Morphogenesis of the *Bacillus anthracis* spore. *J Bacteriol.* 189:691-705.
2. Giorno R, Mallozzi M, Bozue J, Moody KS, Slack A, Qiu D, Wang R, Friedlander A, Welkos S, Driks A. 2009. Localization and assembly of proteins comprising the outer structures of the *Bacillus anthracis* spore. *Microbiol.* 155:1133-1145.
3. Karimova G, Gaudiard E, Davi M, Ouellette SP, Ladant D. 2017. Protein-protein interaction: Bacterial two-hybrid. *Meth Molec Biol.* 1615:59-176.
4. Boone TJ, Mallozzi M, Nelson A, Thompson B, Khemmani M, Lehmann D, Dunkle A, Hoeprich P, Rasley A, Stewart G, Driks A. 2018. Coordinated assembly of the *Bacillus anthracis* coat and exosporium during bacterial spore outer layer formation. *mBio* 9(6):e01166-18. doi: 10.1128/mBio.01166-18.
5. Hermanas TM, Subramanian S, Dann CE 3rd, Stewart GC. 2021. Spore-associated proteins involved in c-di-GMP synthesis and degradation of *Bacillus anthracis*. *J Bacteriol.* 203(17):e0013521.
6. Durand-Heredia J, Stewart GC. 2022. Localization of the CotY and ExsY proteins to the exosporium basal layer of *Bacillus anthracis*. *Mol Microbiol* (submitted for publication).
7. Thompson BM, Hsieh HY, Spreng KA, Stewart GC. 2011. The co-dependence of BxpB/ExsFA and BclA for proper incorporation into the exosporium of *Bacillus anthracis*. *Mol Microbiol.* 79:799-813.
8. Spreng, KA. 2012. Identification and Characterization of *Bacillus anthracis* spore-associated proteins. PhD thesis. University of Missouri, Columbia, MO.
9. Sullivan MA, Yasbin RE, Young FE. 1984. New shuttle vectors for *Bacillus subtilis* and *Escherichia coli* which allow rapid detection of inserted fragments. *Gene* 29:21-26.
